# Supplementary material for: Alkali and alkaline-earth metal complexes with tetraoxa[8]circulene sheet: a computational study by DFT and QTAIM methods
Source: Royal Society of Chemistry journal article supplement (doi:10.1039/c4ra13806f), 2015-01-01
Supplement: c4ra13806f1.pdf [file c4ra13806f1.pdf]

# Alkali and alkaline-earth metal complexes with tetraoxa[8]circulene sheet: A computational study by DFT and QTAIM methods

Nataliya N. Karaush <sup>a</sup>, Gleb V. Baryshnikov<sup>\*a</sup>, Boris F. Minaev <sup>a, b</sup>

<sup>a</sup> Bohdan Khmelnytsky National University, Cherkassy, 18031, Ukraine. E-mail:

[karaush\\_nataliya@rambler.ru](mailto:karaush_nataliya@rambler.ru), [glebchem@rambler.ru](mailto:glebchem@rambler.ru), [bfmin@rambler.ru](mailto:bfmin@rambler.ru)

<sup>b</sup> Tomsk State University, 634050, Tomsk, Russian Federation

## Electronic Supplementary Information

### List of Content

|                                                                                                                    |          |
|--------------------------------------------------------------------------------------------------------------------|----------|
| <b>Figure S1.</b> The optimized structures of the studied complexes <b>1–7</b> based on tetraoxa[8]circulene sheet | <b>2</b> |
| Optimized Cartesian coordinates of the complexes <b>1–7</b> (Tables <b>S2–S8</b> )                                 | <b>3</b> |

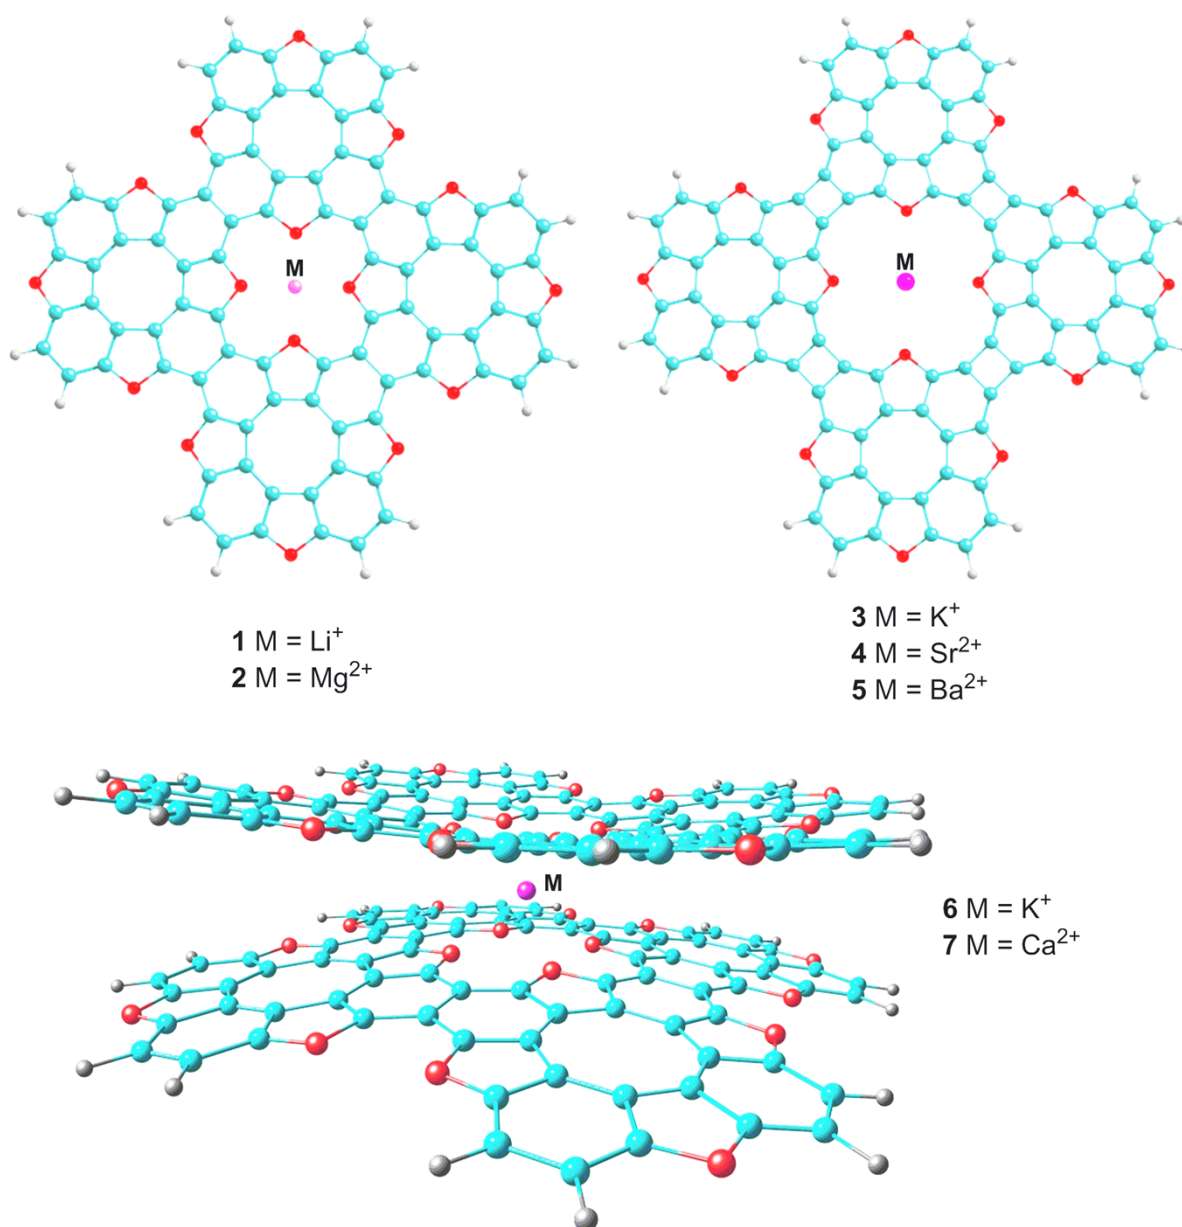

**Figure S1.** The optimized structures of the studied complexes 1–7 based on tetraoxa[8]circulene sheet (Carbon atoms in blue, Oxygen – red, Hydrogen – grey, metal atoms (M) – pink).

**Table S1.** The optimized Cartesian coordinates of the complex **1** in the ground singlet state calculated at the B3LYP/6–31G(d) level of theory

| Center<br>Number | Atomic<br>Number | Coordinates (Angstroms) |           |          |
|------------------|------------------|-------------------------|-----------|----------|
|                  |                  | X                       | Y         | Z        |
| 1                | 6                | -1.495557               | 5.282644  | 0.000000 |
| 2                | 6                | -0.172264               | 5.722552  | 0.000000 |
| 3                | 6                | -1.414443               | 7.544349  | 0.000000 |
| 4                | 6                | -2.302690               | 6.461952  | 0.000000 |
| 5                | 6                | -3.674420               | 6.727196  | 0.000000 |
| 6                | 6                | -4.857466               | 5.929718  | 0.000000 |
| 7                | 6                | -5.933808               | 6.825764  | 0.000000 |
| 8                | 6                | -4.101244               | 8.061074  | 0.000000 |
| 9                | 6                | -5.126186               | 4.558665  | 0.000000 |
| 10               | 6                | -1.761032               | 3.896447  | 0.000000 |
| 11               | 6                | -2.951244               | 3.094139  | 0.000000 |
| 12               | 6                | -4.335795               | 3.368071  | 0.000000 |
| 13               | 8                | -5.481219               | 8.131299  | 0.000000 |
| 14               | 6                | -0.689919               | 3.019254  | 0.000000 |
| 15               | 6                | -2.539933               | 1.772180  | 0.000000 |
| 16               | 6                | -6.462751               | 4.141341  | 0.000000 |
| 17               | 8                | -6.535297               | 2.757608  | 0.000000 |
| 18               | 6                | -3.211004               | 9.142876  | 0.000000 |
| 19               | 6                | -1.835251               | 8.879129  | 0.000000 |
| 20               | 6                | -7.542186               | 5.032148  | 0.000000 |
| 21               | 6                | -7.270568               | 6.406369  | 0.000000 |
| 22               | 1                | -3.577646               | 10.163275 | 0.000000 |
| 23               | 1                | -1.115181               | 9.689582  | 0.000000 |
| 24               | 1                | -8.563577               | 4.668701  | 0.000000 |
| 25               | 1                | -8.078903               | 7.129027  | 0.000000 |
| 26               | 8                | -1.140407               | 1.691775  | 0.000000 |
| 27               | 6                | 0.943751                | 4.847712  | 0.000000 |
| 28               | 6                | 0.664703                | 3.414342  | 0.000000 |
| 29               | 6                | 3.896447                | 1.761032  | 0.000000 |
| 30               | 6                | 3.019254                | 0.689919  | 0.000000 |
| 31               | 6                | 1.772180                | 2.539933  | 0.000000 |
| 32               | 6                | 3.094139                | 2.951244  | 0.000000 |
| 33               | 6                | 3.368071                | 4.335795  | 0.000000 |
| 34               | 6                | 4.558665                | 5.126186  | 0.000000 |
| 35               | 6                | 4.141341                | 6.462751  | 0.000000 |
| 36               | 6                | 2.306450                | 5.239997  | 0.000000 |
| 37               | 6                | 5.929718                | 4.857466  | 0.000000 |
| 38               | 6                | 5.282644                | 1.495557  | 0.000000 |
| 39               | 6                | 6.461952                | 2.302690  | 0.000000 |
| 40               | 6                | 6.727196                | 3.674420  | 0.000000 |
| 41               | 8                | 2.757608                | 6.535297  | 0.000000 |
| 42               | 8                | 1.691775                | 1.140407  | 0.000000 |
| 43               | 6                | 5.722552                | 0.172264  | 0.000000 |
| 44               | 6                | 7.544349                | 1.414443  | 0.000000 |
| 45               | 6                | 6.825764                | 5.933808  | 0.000000 |
| 46               | 8                | 8.131299                | 5.481219  | 0.000000 |
| 47               | 6                | 8.061074                | 4.101244  | 0.000000 |
| 48               | 6                | 6.406369                | 7.270568  | 0.000000 |
| 49               | 6                | 5.032148                | 7.542186  | 0.000000 |
| 50               | 6                | 9.142876                | 3.211004  | 0.000000 |
| 51               | 6                | 8.879129                | 1.835251  | 0.000000 |
| 52               | 1                | 7.129027                | 8.078903  | 0.000000 |
| 53               | 1                | 4.668701                | 8.563577  | 0.000000 |
| 54               | 1                | 10.163275               | 3.577646  | 0.000000 |
| 55               | 1                | 9.689582                | 1.115181  | 0.000000 |
| 56               | 8                | 7.092502                | 0.104552  | 0.000000 |
| 57               | 6                | -3.094139               | -2.951244 | 0.000000 |
| 58               | 6                | -1.772180               | -2.539933 | 0.000000 |
| 59               | 6                | -3.019254               | -0.689919 | 0.000000 |
| 60               | 6                | -3.896447               | -1.761032 | 0.000000 |
| 61               | 6                | -5.282644               | -1.495557 | 0.000000 |
| 62               | 6                | -6.461952               | -2.302690 | 0.000000 |
| 63               | 6                | -7.544349               | -1.414443 | 0.000000 |
| 64               | 6                | -5.722552               | -0.172264 | 0.000000 |
| 65               | 6                | -6.727196               | -3.674420 | 0.000000 |
| 66               | 6                | -3.368071               | -4.335795 | 0.000000 |
| 67               | 6                | -4.558665               | -5.126186 | 0.000000 |
| 68               | 6                | -5.929718               | -4.857466 | 0.000000 |
| 69               | 8                | -7.092502               | -0.104552 | 0.000000 |
| 70               | 8                | -1.691775               | -1.140407 | 0.000000 |

|     |   |            |            |          |
|-----|---|------------|------------|----------|
| 71  | 6 | -2.306450  | -5.239997  | 0.000000 |
| 72  | 6 | -4.141341  | -6.462751  | 0.000000 |
| 73  | 6 | -8.061074  | -4.101244  | 0.000000 |
| 74  | 8 | -8.131299  | -5.481219  | 0.000000 |
| 75  | 6 | -6.825764  | -5.933808  | 0.000000 |
| 76  | 6 | -4.847712  | 0.943751   | 0.000000 |
| 77  | 6 | -3.414342  | 0.664703   | 0.000000 |
| 78  | 6 | -9.142876  | -3.211004  | 0.000000 |
| 79  | 6 | -8.879129  | -1.835251  | 0.000000 |
| 80  | 6 | -6.406369  | -7.270568  | 0.000000 |
| 81  | 6 | -5.032148  | -7.542186  | 0.000000 |
| 82  | 1 | -10.163275 | -3.577646  | 0.000000 |
| 83  | 1 | -9.689582  | -1.115181  | 0.000000 |
| 84  | 1 | -7.129027  | -8.078903  | 0.000000 |
| 85  | 1 | -4.668701  | -8.563577  | 0.000000 |
| 86  | 8 | -2.757608  | -6.535297  | 0.000000 |
| 87  | 6 | -0.664703  | -3.414342  | 0.000000 |
| 88  | 6 | -0.943751  | -4.847712  | 0.000000 |
| 89  | 6 | 2.302690   | -6.461952  | 0.000000 |
| 90  | 6 | 1.414443   | -7.544349  | 0.000000 |
| 91  | 6 | 0.172264   | -5.722552  | 0.000000 |
| 92  | 6 | 1.495557   | -5.282644  | 0.000000 |
| 93  | 6 | 1.761032   | -3.896447  | 0.000000 |
| 94  | 6 | 2.951244   | -3.094139  | 0.000000 |
| 95  | 6 | 2.539933   | -1.772180  | 0.000000 |
| 96  | 6 | 0.689919   | -3.019254  | 0.000000 |
| 97  | 6 | 4.335795   | -3.368071  | 0.000000 |
| 98  | 6 | 3.674420   | -6.727196  | 0.000000 |
| 99  | 6 | 4.857466   | -5.929718  | 0.000000 |
| 100 | 6 | 5.126186   | -4.558665  | 0.000000 |
| 101 | 8 | 1.140407   | -1.691775  | 0.000000 |
| 102 | 8 | 0.104552   | -7.092502  | 0.000000 |
| 103 | 6 | 4.101244   | -8.061074  | 0.000000 |
| 104 | 6 | 5.933808   | -6.825764  | 0.000000 |
| 105 | 6 | 5.239997   | -2.306450  | 0.000000 |
| 106 | 8 | 6.535297   | -2.757608  | 0.000000 |
| 107 | 6 | 6.462751   | -4.141341  | 0.000000 |
| 108 | 6 | 4.847712   | -0.943751  | 0.000000 |
| 109 | 6 | 3.414342   | -0.664703  | 0.000000 |
| 110 | 6 | 3.211004   | -9.142876  | 0.000000 |
| 111 | 6 | 1.835251   | -8.879129  | 0.000000 |
| 112 | 6 | 7.542186   | -5.032148  | 0.000000 |
| 113 | 6 | 7.270568   | -6.406369  | 0.000000 |
| 114 | 1 | 3.577646   | -10.163275 | 0.000000 |
| 115 | 1 | 1.115181   | -9.689582  | 0.000000 |
| 116 | 1 | 8.563577   | -4.668701  | 0.000000 |
| 117 | 1 | 8.078903   | -7.129027  | 0.000000 |
| 118 | 8 | 5.481219   | -8.131299  | 0.000000 |
| 119 | 6 | -5.239997  | 2.306450   | 0.000000 |
| 120 | 8 | -0.104552  | 7.092502   | 0.000000 |
| 121 | 3 | 0.000000   | 0.000000   | 0.000000 |

**Table S2.** The optimized Cartesian coordinates of the complex **2** in the ground singlet state calculated at the B3LYP/6-31G(d) level of theory

| Center Number | Atomic Number | Coordinates (Angstroms) |          |          |
|---------------|---------------|-------------------------|----------|----------|
|               |               | X                       | Y        | Z        |
| 1             | 6             | 1.714867                | 5.226122 | 0.000000 |
| 2             | 6             | 3.063127                | 4.852767 | 0.000000 |
| 3             | 6             | 3.043514                | 7.056365 | 0.000000 |
| 4             | 6             | 1.702751                | 6.653587 | 0.000000 |
| 5             | 6             | 0.712378                | 7.639123 | 0.000000 |
| 6             | 6             | -0.712378               | 7.639123 | 0.000000 |
| 7             | 6             | -1.103717               | 8.983456 | 0.000000 |
| 8             | 6             | 1.103717                | 8.983456 | 0.000000 |
| 9             | 6             | -1.702751               | 6.653587 | 0.000000 |
| 10            | 6             | 0.720632                | 4.222747 | 0.000000 |
| 11            | 6             | -0.720632               | 4.222747 | 0.000000 |
| 12            | 6             | -1.714867               | 5.226122 | 0.000000 |
| 13            | 8             | 0.000000                | 9.810165 | 0.000000 |
| 14            | 6             | 1.134652                | 2.906451 | 0.000000 |
| 15            | 6             | -1.134652               | 2.906451 | 0.000000 |
| 16            | 6             | -3.043514               | 7.056365 | 0.000000 |
| 17            | 8             | -3.877942               | 5.947465 | 0.000000 |

|    |   |            |           |          |
|----|---|------------|-----------|----------|
| 18 | 6 | 2.447487   | 9.383657  | 0.000000 |
| 19 | 6 | 3.441706   | 8.398272  | 0.000000 |
| 20 | 6 | -3.441706  | 8.398272  | 0.000000 |
| 21 | 6 | -2.447487  | 9.383657  | 0.000000 |
| 22 | 1 | 2.713091   | 10.434843 | 0.000000 |
| 23 | 1 | 4.491271   | 8.669159  | 0.000000 |
| 24 | 1 | -4.491271  | 8.669159  | 0.000000 |
| 25 | 1 | -2.713091  | 10.434843 | 0.000000 |
| 26 | 8 | 0.000000   | 2.035665  | 0.000000 |
| 27 | 6 | 3.506009   | 3.506009  | 0.000000 |
| 28 | 6 | 2.471939   | 2.471939  | 0.000000 |
| 29 | 6 | 4.222747   | -0.720632 | 0.000000 |
| 30 | 6 | 2.906451   | -1.134652 | 0.000000 |
| 31 | 6 | 2.906451   | 1.134652  | 0.000000 |
| 32 | 6 | 4.222747   | 0.720632  | 0.000000 |
| 33 | 6 | 5.226122   | 1.714867  | 0.000000 |
| 34 | 6 | 6.653587   | 1.702751  | 0.000000 |
| 35 | 6 | 7.056365   | 3.043514  | 0.000000 |
| 36 | 6 | 4.852767   | 3.063127  | 0.000000 |
| 37 | 6 | 7.639123   | 0.712378  | 0.000000 |
| 38 | 6 | 5.226122   | -1.714867 | 0.000000 |
| 39 | 6 | 6.653587   | -1.702751 | 0.000000 |
| 40 | 6 | 7.639123   | -0.712378 | 0.000000 |
| 41 | 8 | 5.947465   | 3.877942  | 0.000000 |
| 42 | 8 | 2.035665   | 0.000000  | 0.000000 |
| 43 | 6 | 4.852767   | -3.063127 | 0.000000 |
| 44 | 6 | 7.056365   | -3.043514 | 0.000000 |
| 45 | 6 | 8.983456   | 1.103717  | 0.000000 |
| 46 | 8 | 9.810165   | 0.000000  | 0.000000 |
| 47 | 6 | 8.983456   | -1.103717 | 0.000000 |
| 48 | 6 | 9.383657   | 2.447487  | 0.000000 |
| 49 | 6 | 8.398272   | 3.441706  | 0.000000 |
| 50 | 6 | 9.383657   | -2.447487 | 0.000000 |
| 51 | 6 | 8.398272   | -3.441706 | 0.000000 |
| 52 | 1 | 10.434843  | 2.713091  | 0.000000 |
| 53 | 1 | 8.669159   | 4.491271  | 0.000000 |
| 54 | 1 | 10.434843  | -2.713091 | 0.000000 |
| 55 | 1 | 8.669159   | -4.491271 | 0.000000 |
| 56 | 8 | 5.947465   | -3.877942 | 0.000000 |
| 57 | 6 | -4.222747  | -0.720632 | 0.000000 |
| 58 | 6 | -2.906451  | -1.134652 | 0.000000 |
| 59 | 6 | -2.906451  | 1.134652  | 0.000000 |
| 60 | 6 | -4.222747  | 0.720632  | 0.000000 |
| 61 | 6 | -5.226122  | 1.714867  | 0.000000 |
| 62 | 6 | -6.653587  | 1.702751  | 0.000000 |
| 63 | 6 | -7.056365  | 3.043514  | 0.000000 |
| 64 | 6 | -4.852767  | 3.063127  | 0.000000 |
| 65 | 6 | -7.639123  | 0.712378  | 0.000000 |
| 66 | 6 | -5.226122  | -1.714867 | 0.000000 |
| 67 | 6 | -6.653587  | -1.702751 | 0.000000 |
| 68 | 6 | -7.639123  | -0.712378 | 0.000000 |
| 69 | 8 | -5.947465  | 3.877942  | 0.000000 |
| 70 | 8 | -2.035665  | 0.000000  | 0.000000 |
| 71 | 6 | -4.852767  | -3.063127 | 0.000000 |
| 72 | 6 | -7.056365  | -3.043514 | 0.000000 |
| 73 | 6 | -8.983456  | 1.103717  | 0.000000 |
| 74 | 8 | -9.810165  | 0.000000  | 0.000000 |
| 75 | 6 | -8.983456  | -1.103717 | 0.000000 |
| 76 | 6 | -3.506009  | 3.506009  | 0.000000 |
| 77 | 6 | -2.471939  | 2.471939  | 0.000000 |
| 78 | 6 | -9.383657  | 2.447487  | 0.000000 |
| 79 | 6 | -8.398272  | 3.441706  | 0.000000 |
| 80 | 6 | -9.383657  | -2.447487 | 0.000000 |
| 81 | 6 | -8.398272  | -3.441706 | 0.000000 |
| 82 | 1 | -10.434843 | 2.713091  | 0.000000 |
| 83 | 1 | -8.669159  | 4.491271  | 0.000000 |
| 84 | 1 | -10.434843 | -2.713091 | 0.000000 |
| 85 | 1 | -8.669159  | -4.491271 | 0.000000 |
| 86 | 8 | -5.947465  | -3.877942 | 0.000000 |
| 87 | 6 | -2.471939  | -2.471939 | 0.000000 |
| 88 | 6 | -3.506009  | -3.506009 | 0.000000 |
| 89 | 6 | -1.702751  | -6.653587 | 0.000000 |
| 90 | 6 | -3.043514  | -7.056365 | 0.000000 |
| 91 | 6 | -3.063127  | -4.852767 | 0.000000 |
| 92 | 6 | -1.714867  | -5.226122 | 0.000000 |
| 93 | 6 | -0.720632  | -4.222747 | 0.000000 |
| 94 | 6 | 0.720632   | -4.222747 | 0.000000 |
| 95 | 6 | 1.134652   | -2.906451 | 0.000000 |
| 96 | 6 | -1.134652  | -2.906451 | 0.000000 |

|     |    |           |            |          |
|-----|----|-----------|------------|----------|
| 97  | 6  | 1.714867  | -5.226122  | 0.000000 |
| 98  | 6  | -0.712378 | -7.639123  | 0.000000 |
| 99  | 6  | 0.712378  | -7.639123  | 0.000000 |
| 100 | 6  | 1.702751  | -6.653587  | 0.000000 |
| 101 | 8  | 0.000000  | -2.035665  | 0.000000 |
| 102 | 8  | -3.877942 | -5.947465  | 0.000000 |
| 103 | 6  | -1.103717 | -8.983456  | 0.000000 |
| 104 | 6  | 1.103717  | -8.983456  | 0.000000 |
| 105 | 6  | 3.063127  | -4.852767  | 0.000000 |
| 106 | 8  | 3.877942  | -5.947465  | 0.000000 |
| 107 | 6  | 3.043514  | -7.056365  | 0.000000 |
| 108 | 6  | 3.506009  | -3.506009  | 0.000000 |
| 109 | 6  | 2.471939  | -2.471939  | 0.000000 |
| 110 | 6  | -2.447487 | -9.383657  | 0.000000 |
| 111 | 6  | -3.441706 | -8.398272  | 0.000000 |
| 112 | 6  | 3.441706  | -8.398272  | 0.000000 |
| 113 | 6  | 2.447487  | -9.383657  | 0.000000 |
| 114 | 1  | -2.713091 | -10.434843 | 0.000000 |
| 115 | 1  | -4.491271 | -8.669159  | 0.000000 |
| 116 | 1  | 4.491271  | -8.669159  | 0.000000 |
| 117 | 1  | 2.713091  | -10.434843 | 0.000000 |
| 118 | 8  | 0.000000  | -9.810165  | 0.000000 |
| 119 | 6  | -3.063127 | 4.852767   | 0.000000 |
| 120 | 8  | 3.877942  | 5.947465   | 0.000000 |
| 121 | 12 | 0.000000  | 0.000000   | 0.000000 |

**Table S3.** The optimized Cartesian coordinates of the complex **3** in the ground singlet state calculated the B3LYP/6-31G(d) level of theory

| Center Number | Atomic Number | Coordinates (Angstroms) |           |          |
|---------------|---------------|-------------------------|-----------|----------|
|               |               | X                       | Y         | Z        |
| 1             | 19            | 0.000000                | 0.000000  | 0.000000 |
| 2             | 6             | 3.042296                | 8.034287  | 0.000000 |
| 3             | 6             | 1.703722                | 7.623279  | 0.000000 |
| 4             | 6             | 0.714931                | 8.610400  | 0.000000 |
| 5             | 6             | -0.714931               | 8.610400  | 0.000000 |
| 6             | 6             | -1.102961               | 9.956380  | 0.000000 |
| 7             | 6             | 1.102961                | 9.956380  | 0.000000 |
| 8             | 6             | -1.703722               | 7.623279  | 0.000000 |
| 9             | 8             | 0.000000                | 10.786097 | 0.000000 |
| 10            | 6             | -3.042296               | 8.034287  | 0.000000 |
| 11            | 6             | 2.443501                | 10.362941 | 0.000000 |
| 12            | 6             | 3.436540                | 9.377286  | 0.000000 |
| 13            | 6             | -3.436540               | 9.377286  | 0.000000 |
| 14            | 6             | -2.443501               | 10.362941 | 0.000000 |
| 15            | 1             | 2.705313                | 11.415325 | 0.000000 |
| 16            | 1             | 4.486984                | 9.645691  | 0.000000 |
| 17            | 1             | -4.486984               | 9.645691  | 0.000000 |
| 18            | 1             | -2.705313               | 11.415325 | 0.000000 |
| 19            | 6             | 1.710559                | 6.186981  | 0.000000 |
| 20            | 6             | 3.095710                | 5.832180  | 0.000000 |
| 21            | 6             | 0.721457                | 5.198211  | 0.000000 |
| 22            | 6             | -0.721457               | 5.198211  | 0.000000 |
| 23            | 6             | -1.710559               | 6.186981  | 0.000000 |
| 24            | 6             | 1.110088                | 3.827837  | 0.000000 |
| 25            | 6             | -1.110088               | 3.827837  | 0.000000 |
| 26            | 6             | -3.095710               | 5.832180  | 0.000000 |
| 27            | 6             | 2.435153                | 3.491441  | 0.000000 |
| 28            | 6             | 3.447890                | 4.504576  | 0.000000 |
| 29            | 6             | -3.447890               | 4.504576  | 0.000000 |
| 30            | 6             | -2.435153               | 3.491441  | 0.000000 |
| 31            | 8             | 0.000000                | 2.982693  | 0.000000 |
| 32            | 8             | 3.897962                | 6.945099  | 0.000000 |
| 33            | 8             | -3.897962               | 6.945099  | 0.000000 |
| 34            | 6             | 9.956380                | 1.102961  | 0.000000 |
| 35            | 6             | 8.610400                | 0.714931  | 0.000000 |
| 36            | 6             | 7.623279                | 1.703722  | 0.000000 |
| 37            | 6             | 6.186981                | 1.710559  | 0.000000 |
| 38            | 6             | 5.832180                | 3.095710  | 0.000000 |
| 39            | 6             | 8.034287                | 3.042296  | 0.000000 |
| 40            | 6             | 5.198211                | 0.721457  | 0.000000 |
| 41            | 8             | 6.945099                | 3.897962  | 0.000000 |

|     |   |            |            |          |
|-----|---|------------|------------|----------|
| 42  | 6 | 3.827837   | 1.110088   | 0.000000 |
| 43  | 6 | 9.377286   | 3.436540   | 0.000000 |
| 44  | 6 | 10.362941  | 2.443501   | 0.000000 |
| 45  | 6 | 3.491441   | 2.435153   | 0.000000 |
| 46  | 6 | 4.504576   | 3.447890   | 0.000000 |
| 47  | 1 | 9.645691   | 4.486984   | 0.000000 |
| 48  | 1 | 11.415325  | 2.705313   | 0.000000 |
| 49  | 6 | 8.610400   | -0.714931  | 0.000000 |
| 50  | 6 | 9.956380   | -1.102961  | 0.000000 |
| 51  | 6 | 7.623279   | -1.703722  | 0.000000 |
| 52  | 6 | 6.186981   | -1.710559  | 0.000000 |
| 53  | 6 | 5.198211   | -0.721457  | 0.000000 |
| 54  | 6 | 8.034287   | -3.042296  | 0.000000 |
| 55  | 6 | 5.832180   | -3.095710  | 0.000000 |
| 56  | 6 | 3.827837   | -1.110088  | 0.000000 |
| 57  | 6 | 9.377286   | -3.436540  | 0.000000 |
| 58  | 6 | 10.362941  | -2.443501  | 0.000000 |
| 59  | 6 | 3.491441   | -2.435153  | 0.000000 |
| 60  | 6 | 4.504576   | -3.447890  | 0.000000 |
| 61  | 1 | 9.645691   | -4.486984  | 0.000000 |
| 62  | 1 | 11.415325  | -2.705313  | 0.000000 |
| 63  | 8 | 6.945099   | -3.897962  | 0.000000 |
| 64  | 8 | 10.786097  | 0.000000   | 0.000000 |
| 65  | 8 | 2.982693   | 0.000000   | 0.000000 |
| 66  | 6 | -3.827837  | 1.110088   | 0.000000 |
| 67  | 6 | -5.198211  | 0.721457   | 0.000000 |
| 68  | 6 | -6.186981  | 1.710559   | 0.000000 |
| 69  | 6 | -7.623279  | 1.703722   | 0.000000 |
| 70  | 6 | -8.034287  | 3.042296   | 0.000000 |
| 71  | 6 | -5.832180  | 3.095710   | 0.000000 |
| 72  | 6 | -8.610400  | 0.714931   | 0.000000 |
| 73  | 8 | -6.945099  | 3.897962   | 0.000000 |
| 74  | 6 | -9.956380  | 1.102961   | 0.000000 |
| 75  | 6 | -4.504576  | 3.447890   | 0.000000 |
| 76  | 6 | -3.491441  | 2.435153   | 0.000000 |
| 77  | 6 | -10.362941 | 2.443501   | 0.000000 |
| 78  | 6 | -9.377286  | 3.436540   | 0.000000 |
| 79  | 1 | -11.415325 | 2.705313   | 0.000000 |
| 80  | 1 | -9.645691  | 4.486984   | 0.000000 |
| 81  | 6 | -5.198211  | -0.721457  | 0.000000 |
| 82  | 6 | -3.827837  | -1.110088  | 0.000000 |
| 83  | 6 | -6.186981  | -1.710559  | 0.000000 |
| 84  | 6 | -7.623279  | -1.703722  | 0.000000 |
| 85  | 6 | -8.610400  | -0.714931  | 0.000000 |
| 86  | 6 | -5.832180  | -3.095710  | 0.000000 |
| 87  | 6 | -8.034287  | -3.042296  | 0.000000 |
| 88  | 6 | -9.956380  | -1.102961  | 0.000000 |
| 89  | 6 | -4.504576  | -3.447890  | 0.000000 |
| 90  | 6 | -3.491441  | -2.435153  | 0.000000 |
| 91  | 6 | -10.362941 | -2.443501  | 0.000000 |
| 92  | 6 | -9.377286  | -3.436540  | 0.000000 |
| 93  | 1 | -11.415325 | -2.705313  | 0.000000 |
| 94  | 1 | -9.645691  | -4.486984  | 0.000000 |
| 95  | 8 | -6.945099  | -3.897962  | 0.000000 |
| 96  | 8 | -2.982693  | 0.000000   | 0.000000 |
| 97  | 8 | -10.786097 | 0.000000   | 0.000000 |
| 98  | 6 | 3.095710   | -5.832180  | 0.000000 |
| 99  | 6 | 1.710559   | -6.186981  | 0.000000 |
| 100 | 6 | 0.721457   | -5.198211  | 0.000000 |
| 101 | 6 | -0.721457  | -5.198211  | 0.000000 |
| 102 | 6 | -1.110088  | -3.827837  | 0.000000 |
| 103 | 6 | 1.110088   | -3.827837  | 0.000000 |
| 104 | 6 | -1.710559  | -6.186981  | 0.000000 |
| 105 | 8 | 0.000000   | -2.982693  | 0.000000 |
| 106 | 6 | -3.095710  | -5.832180  | 0.000000 |
| 107 | 6 | 2.435153   | -3.491441  | 0.000000 |
| 108 | 6 | 3.447890   | -4.504576  | 0.000000 |
| 109 | 6 | -3.447890  | -4.504576  | 0.000000 |
| 110 | 6 | -2.435153  | -3.491441  | 0.000000 |
| 111 | 6 | 1.703722   | -7.623279  | 0.000000 |
| 112 | 6 | 3.042296   | -8.034287  | 0.000000 |
| 113 | 6 | 0.714931   | -8.610400  | 0.000000 |
| 114 | 6 | -0.714931  | -8.610400  | 0.000000 |
| 115 | 6 | -1.703722  | -7.623279  | 0.000000 |
| 116 | 6 | 1.102961   | -9.956380  | 0.000000 |
| 117 | 6 | -1.102961  | -9.956380  | 0.000000 |
| 118 | 6 | -3.042296  | -8.034287  | 0.000000 |
| 119 | 6 | 2.443501   | -10.362941 | 0.000000 |
| 120 | 6 | 3.436540   | -9.377286  | 0.000000 |

|     |   |           |            |          |
|-----|---|-----------|------------|----------|
| 121 | 6 | -3.436540 | -9.377286  | 0.000000 |
| 122 | 6 | -2.443501 | -10.362941 | 0.000000 |
| 123 | 1 | 2.705313  | -11.415325 | 0.000000 |
| 124 | 1 | 4.486984  | -9.645691  | 0.000000 |
| 125 | 1 | -4.486984 | -9.645691  | 0.000000 |
| 126 | 1 | -2.705313 | -11.415325 | 0.000000 |
| 127 | 8 | 0.000000  | -10.786097 | 0.000000 |
| 128 | 8 | 3.897962  | -6.945099  | 0.000000 |
| 129 | 8 | -3.897962 | -6.945099  | 0.000000 |

**Table S4.** The optimized Cartesian coordinates of the complex **4** in the ground singlet state calculated at the B3LYP/LanL2Dz level of theory

| Center<br>Number | Atomic<br>Number | Coordinates (Angstroms) |           |          |
|------------------|------------------|-------------------------|-----------|----------|
|                  |                  | X                       | Y         | Z        |
| 1                | 38               | 0.000000                | 0.000000  | 0.000000 |
| 2                | 6                | -3.568048               | 7.891314  | 0.000000 |
| 3                | 6                | -4.217291               | 6.635958  | 0.000000 |
| 4                | 6                | -5.620234               | 6.637954  | 0.000000 |
| 5                | 6                | -6.637746               | 5.620412  | 0.000000 |
| 6                | 6                | -7.880779               | 6.291799  | 0.000000 |
| 7                | 6                | -6.291551               | 7.880929  | 0.000000 |
| 8                | 6                | -6.635872               | 4.217250  | 0.000000 |
| 9                | 8                | -7.686339               | 7.686617  | 0.000000 |
| 10               | 6                | -7.891472               | 3.568132  | 0.000000 |
| 11               | 6                | -5.637764               | 9.126049  | 0.000000 |
| 12               | 6                | -4.229209               | 9.130779  | 0.000000 |
| 13               | 6                | -9.130947               | 4.229403  | 0.000000 |
| 14               | 6                | -9.126082               | 5.638035  | 0.000000 |
| 15               | 1                | -6.202455               | 10.051827 | 0.000000 |
| 16               | 1                | -3.669525               | 10.059327 | 0.000000 |
| 17               | 1                | -10.059579              | 3.669818  | 0.000000 |
| 18               | 1                | -10.051837              | 6.202878  | 0.000000 |
| 19               | 6                | -3.187911               | 5.617080  | 0.000000 |
| 20               | 6                | -1.940655               | 6.348881  | 0.000000 |
| 21               | 6                | -3.181817               | 4.208837  | 0.000000 |
| 22               | 6                | -4.209021               | 3.181577  | 0.000000 |
| 23               | 6                | -5.617178               | 3.187667  | 0.000000 |
| 24               | 6                | -1.919448               | 3.525227  | 0.000000 |
| 25               | 6                | -3.525425               | 1.919219  | 0.000000 |
| 26               | 6                | -6.349069               | 1.940567  | 0.000000 |
| 27               | 6                | -0.747224               | 4.220823  | 0.000000 |
| 28               | 6                | -0.749916               | 5.665982  | 0.000000 |
| 29               | 6                | -5.666219               | 0.749823  | 0.000000 |
| 30               | 6                | -4.221078               | 0.747046  | 0.000000 |
| 31               | 8                | -2.089377               | 2.089187  | 0.000000 |
| 32               | 8                | -2.160552               | 7.725449  | 0.000000 |
| 33               | 8                | -7.725629               | 2.160563  | 0.000000 |
| 34               | 6                | 6.291539                | 7.881410  | 0.000000 |
| 35               | 6                | 5.620350                | 6.638262  | 0.000000 |
| 36               | 6                | 4.217251                | 6.635998  | 0.000000 |
| 37               | 6                | 3.187758                | 5.617103  | 0.000000 |
| 38               | 6                | 1.940655                | 6.348821  | 0.000000 |
| 39               | 6                | 3.567909                | 7.891272  | 0.000000 |
| 40               | 6                | 3.181644                | 4.208903  | 0.000000 |
| 41               | 8                | 2.160567                | 7.725268  | 0.000000 |
| 42               | 6                | 1.919247                | 3.525148  | 0.000000 |
| 43               | 6                | 4.228702                | 9.130804  | 0.000000 |
| 44               | 6                | 5.637322                | 9.126598  | 0.000000 |
| 45               | 6                | 0.746964                | 4.220760  | 0.000000 |
| 46               | 6                | 0.749916                | 5.665985  | 0.000000 |
| 47               | 1                | 3.668906                | 10.059248 | 0.000000 |
| 48               | 1                | 6.201933                | 10.052549 | 0.000000 |
| 49               | 6                | 6.637819                | 5.620772  | 0.000000 |
| 50               | 6                | 7.881042                | 6.292068  | 0.000000 |
| 51               | 6                | 6.635814                | 4.217453  | 0.000000 |
| 52               | 6                | 5.617105                | 3.187880  | 0.000000 |
| 53               | 6                | 4.208842                | 3.181675  | 0.000000 |
| 54               | 6                | 7.891337                | 3.568257  | 0.000000 |
| 55               | 6                | 6.349041                | 1.940771  | 0.000000 |
| 56               | 6                | 3.525276                | 1.919275  | 0.000000 |
| 57               | 6                | 9.130854                | 4.229456  | 0.000000 |



|     |   |            |            |          |
|-----|---|------------|------------|----------|
| 58  | 6 | 9.126286   | 5.638099   | 0.000000 |
| 59  | 6 | 4.221000   | 0.747122   | 0.000000 |
| 60  | 6 | 5.666184   | 0.749996   | 0.000000 |
| 61  | 1 | 10.059434  | 3.669747   | 0.000000 |
| 62  | 1 | 10.052137  | 6.202834   | 0.000000 |
| 63  | 8 | 7.725544   | 2.160807   | 0.000000 |
| 64  | 8 | 7.686547   | 7.687045   | 0.000000 |
| 65  | 8 | 2.089233   | 2.089107   | 0.000000 |
| 66  | 6 | -3.525276  | -1.919275  | 0.000000 |
| 67  | 6 | -4.208842  | -3.181675  | 0.000000 |
| 68  | 6 | -5.617105  | -3.187880  | 0.000000 |
| 69  | 6 | -6.635814  | -4.217453  | 0.000000 |
| 70  | 6 | -7.891337  | -3.568257  | 0.000000 |
| 71  | 6 | -6.349041  | -1.940771  | 0.000000 |
| 72  | 6 | -6.637819  | -5.620772  | 0.000000 |
| 73  | 8 | -7.725544  | -2.160807  | 0.000000 |
| 74  | 6 | -7.881042  | -6.292068  | 0.000000 |
| 75  | 6 | -5.666184  | -0.749996  | 0.000000 |
| 76  | 6 | -4.221000  | -0.747122  | 0.000000 |
| 77  | 6 | -9.126286  | -5.638099  | 0.000000 |
| 78  | 6 | -9.130854  | -4.229456  | 0.000000 |
| 79  | 1 | -10.052137 | -6.202834  | 0.000000 |
| 80  | 1 | -10.059434 | -3.669747  | 0.000000 |
| 81  | 6 | -3.181644  | -4.208903  | 0.000000 |
| 82  | 6 | -1.919247  | -3.525148  | 0.000000 |
| 83  | 6 | -3.187758  | -5.617103  | 0.000000 |
| 84  | 6 | -4.217251  | -6.635998  | 0.000000 |
| 85  | 6 | -5.620350  | -6.638262  | 0.000000 |
| 86  | 6 | -1.940655  | -6.348821  | 0.000000 |
| 87  | 6 | -3.567909  | -7.891272  | 0.000000 |
| 88  | 6 | -6.291539  | -7.881410  | 0.000000 |
| 89  | 6 | -0.749916  | -5.665985  | 0.000000 |
| 90  | 6 | -0.746964  | -4.220760  | 0.000000 |
| 91  | 6 | -5.637322  | -9.126598  | 0.000000 |
| 92  | 6 | -4.228702  | -9.130804  | 0.000000 |
| 93  | 1 | -6.201933  | -10.052549 | 0.000000 |
| 94  | 1 | -3.668906  | -10.059248 | 0.000000 |
| 95  | 8 | -2.160567  | -7.725268  | 0.000000 |
| 96  | 8 | -2.089233  | -2.089107  | 0.000000 |
| 97  | 8 | -7.686547  | -7.687045  | 0.000000 |
| 98  | 6 | 6.349069   | -1.940567  | 0.000000 |
| 99  | 6 | 5.617178   | -3.187667  | 0.000000 |
| 100 | 6 | 4.209021   | -3.181577  | 0.000000 |
| 101 | 6 | 3.181817   | -4.208837  | 0.000000 |
| 102 | 6 | 1.919448   | -3.525227  | 0.000000 |
| 103 | 6 | 3.525425   | -1.919219  | 0.000000 |
| 104 | 6 | 3.187911   | -5.617080  | 0.000000 |
| 105 | 8 | 2.089377   | -2.089187  | 0.000000 |
| 106 | 6 | 1.940655   | -6.348881  | 0.000000 |
| 107 | 6 | 4.221078   | -0.747046  | 0.000000 |
| 108 | 6 | 5.666219   | -0.749823  | 0.000000 |
| 109 | 6 | 0.749916   | -5.665982  | 0.000000 |
| 110 | 6 | 0.747224   | -4.220823  | 0.000000 |
| 111 | 6 | 6.635872   | -4.217250  | 0.000000 |
| 112 | 6 | 7.891472   | -3.568132  | 0.000000 |
| 113 | 6 | 6.637746   | -5.620412  | 0.000000 |
| 114 | 6 | 5.620234   | -6.637954  | 0.000000 |
| 115 | 6 | 4.217291   | -6.635958  | 0.000000 |
| 116 | 6 | 7.880779   | -6.291799  | 0.000000 |
| 117 | 6 | 6.291551   | -7.880929  | 0.000000 |
| 118 | 6 | 3.568048   | -7.891314  | 0.000000 |
| 119 | 6 | 9.126082   | -5.638035  | 0.000000 |
| 120 | 6 | 9.130947   | -4.229403  | 0.000000 |
| 121 | 6 | 4.229209   | -9.130779  | 0.000000 |
| 122 | 6 | 5.637764   | -9.126049  | 0.000000 |
| 123 | 1 | 10.051837  | -6.202878  | 0.000000 |
| 124 | 1 | 10.059579  | -3.669818  | 0.000000 |
| 125 | 1 | 3.669525   | -10.059327 | 0.000000 |
| 126 | 1 | 6.202455   | -10.051827 | 0.000000 |
| 127 | 8 | 7.686339   | -7.686617  | 0.000000 |
| 128 | 8 | 7.725629   | -2.160563  | 0.000000 |
| 129 | 8 | 2.160552   | -7.725449  | 0.000000 |

**Table S5.** The optimized Cartesian coordinates of the complex **5** in the ground singlet state calculated at the B3LYP/ LanL2Dz level of theory

| Center<br>Number | Atomic<br>Number | Coordinates (Angstroms) |           |          |
|------------------|------------------|-------------------------|-----------|----------|
|                  |                  | X                       | Y         | Z        |
| 1                | 56               | 0.000000                | 0.000000  | 0.000000 |
| 2                | 6                | 3.058802                | 8.110919  | 0.000000 |
| 3                | 6                | 1.712279                | 7.682853  | 0.000000 |
| 4                | 6                | 0.719924                | 8.674784  | 0.000000 |
| 5                | 6                | -0.719924               | 8.674784  | 0.000000 |
| 6                | 6                | -1.123911               | 10.028474 | 0.000000 |
| 7                | 6                | 1.123911                | 10.028474 | 0.000000 |
| 8                | 6                | -1.712279               | 7.682853  | 0.000000 |
| 9                | 8                | 0.000000                | 10.877312 | 0.000000 |
| 10               | 6                | -3.058802               | 8.110919  | 0.000000 |
| 11               | 6                | 2.466819                | 10.446945 | 0.000000 |
| 12               | 6                | 3.467043                | 9.454911  | 0.000000 |
| 13               | 6                | -3.467043               | 9.454911  | 0.000000 |
| 14               | 6                | -2.466819               | 10.446945 | 0.000000 |
| 15               | 1                | 2.721655                | 11.501070 | 0.000000 |
| 16               | 1                | 4.519038                | 9.716947  | 0.000000 |
| 17               | 1                | -4.519038               | 9.716947  | 0.000000 |
| 18               | 1                | -2.721655               | 11.501070 | 0.000000 |
| 19               | 6                | 1.720227                | 6.235015  | 0.000000 |
| 20               | 6                | 3.119460                | 5.868079  | 0.000000 |
| 21               | 6                | 0.727270                | 5.237925  | 0.000000 |
| 22               | 6                | -0.727270               | 5.237925  | 0.000000 |
| 23               | 6                | -1.720227               | 6.235015  | 0.000000 |
| 24               | 6                | 1.136695                | 3.862581  | 0.000000 |
| 25               | 6                | -1.136695               | 3.862581  | 0.000000 |
| 26               | 6                | -3.119460               | 5.868079  | 0.000000 |
| 27               | 6                | 2.458664                | 3.518931  | 0.000000 |
| 28               | 6                | 3.479905                | 4.542155  | 0.000000 |
| 29               | 6                | -3.479905               | 4.542155  | 0.000000 |
| 30               | 6                | -2.458664               | 3.518931  | 0.000000 |
| 31               | 8                | 0.000000                | 2.975614  | 0.000000 |
| 32               | 8                | 3.936682                | 6.998143  | 0.000000 |
| 33               | 8                | -3.936682               | 6.998143  | 0.000000 |
| 34               | 6                | 10.028474               | 1.123911  | 0.000000 |
| 35               | 6                | 8.674784                | 0.719924  | 0.000000 |
| 36               | 6                | 7.682853                | 1.712279  | 0.000000 |
| 37               | 6                | 6.235015                | 1.720227  | 0.000000 |
| 38               | 6                | 5.868079                | 3.119460  | 0.000000 |
| 39               | 6                | 8.110919                | 3.058802  | 0.000000 |
| 40               | 6                | 5.237925                | 0.727270  | 0.000000 |
| 41               | 8                | 6.998143                | 3.936682  | 0.000000 |
| 42               | 6                | 3.862581                | 1.136695  | 0.000000 |
| 43               | 6                | 9.454911                | 3.467043  | 0.000000 |
| 44               | 6                | 10.446945               | 2.466819  | 0.000000 |
| 45               | 6                | 3.518931                | 2.458664  | 0.000000 |
| 46               | 6                | 4.542155                | 3.479905  | 0.000000 |
| 47               | 1                | 9.716947                | 4.519038  | 0.000000 |
| 48               | 1                | 11.501070               | 2.721655  | 0.000000 |
| 49               | 6                | 8.674784                | -0.719924 | 0.000000 |
| 50               | 6                | 10.028474               | -1.123911 | 0.000000 |
| 51               | 6                | 7.682853                | -1.712279 | 0.000000 |
| 52               | 6                | 6.235015                | -1.720227 | 0.000000 |
| 53               | 6                | 5.237925                | -0.727270 | 0.000000 |
| 54               | 6                | 8.110919                | -3.058802 | 0.000000 |
| 55               | 6                | 5.868079                | -3.119460 | 0.000000 |
| 56               | 6                | 3.862581                | -1.136695 | 0.000000 |
| 57               | 6                | 9.454911                | -3.467043 | 0.000000 |
| 58               | 6                | 10.446945               | -2.466819 | 0.000000 |
| 59               | 6                | 3.518931                | -2.458664 | 0.000000 |
| 60               | 6                | 4.542155                | -3.479905 | 0.000000 |
| 61               | 1                | 9.716947                | -4.519038 | 0.000000 |
| 62               | 1                | 11.501070               | -2.721655 | 0.000000 |
| 63               | 8                | 6.998143                | -3.936682 | 0.000000 |
| 64               | 8                | 10.877312               | 0.000000  | 0.000000 |
| 65               | 8                | 2.975614                | 0.000000  | 0.000000 |
| 66               | 6                | -3.862581               | 1.136695  | 0.000000 |
| 67               | 6                | -5.237925               | 0.727270  | 0.000000 |
| 68               | 6                | -6.235015               | 1.720227  | 0.000000 |
| 69               | 6                | -7.682853               | 1.712279  | 0.000000 |
| 70               | 6                | -8.110919               | 3.058802  | 0.000000 |

|     |   |            |            |          |
|-----|---|------------|------------|----------|
| 71  | 6 | -5.868079  | 3.119460   | 0.000000 |
| 72  | 6 | -8.674784  | 0.719924   | 0.000000 |
| 73  | 8 | -6.998143  | 3.936682   | 0.000000 |
| 74  | 6 | -10.028474 | 1.123911   | 0.000000 |
| 75  | 6 | -4.542155  | 3.479905   | 0.000000 |
| 76  | 6 | -3.518931  | 2.458664   | 0.000000 |
| 77  | 6 | -10.446945 | 2.466819   | 0.000000 |
| 78  | 6 | -9.454911  | 3.467043   | 0.000000 |
| 79  | 1 | -11.501070 | 2.721655   | 0.000000 |
| 80  | 1 | -9.716947  | 4.519038   | 0.000000 |
| 81  | 6 | -5.237925  | -0.727270  | 0.000000 |
| 82  | 6 | -3.862581  | -1.136695  | 0.000000 |
| 83  | 6 | -6.235015  | -1.720227  | 0.000000 |
| 84  | 6 | -7.682853  | -1.712279  | 0.000000 |
| 85  | 6 | -8.674784  | -0.719924  | 0.000000 |
| 86  | 6 | -5.868079  | -3.119460  | 0.000000 |
| 87  | 6 | -8.110919  | -3.058802  | 0.000000 |
| 88  | 6 | -10.028474 | -1.123911  | 0.000000 |
| 89  | 6 | -4.542155  | -3.479905  | 0.000000 |
| 90  | 6 | -3.518931  | -2.458664  | 0.000000 |
| 91  | 6 | -10.446945 | -2.466819  | 0.000000 |
| 92  | 6 | -9.454911  | -3.467043  | 0.000000 |
| 93  | 1 | -11.501070 | -2.721655  | 0.000000 |
| 94  | 1 | -9.716947  | -4.519038  | 0.000000 |
| 95  | 8 | -6.998143  | -3.936682  | 0.000000 |
| 96  | 8 | -2.975614  | 0.000000   | 0.000000 |
| 97  | 8 | -10.877312 | 0.000000   | 0.000000 |
| 98  | 6 | 3.119460   | -5.868079  | 0.000000 |
| 99  | 6 | 1.720227   | -6.235015  | 0.000000 |
| 100 | 6 | 0.727270   | -5.237925  | 0.000000 |
| 101 | 6 | -0.727270  | -5.237925  | 0.000000 |
| 102 | 6 | -1.136695  | -3.862581  | 0.000000 |
| 103 | 6 | 1.136695   | -3.862581  | 0.000000 |
| 104 | 6 | -1.720227  | -6.235015  | 0.000000 |
| 105 | 8 | 0.000000   | -2.975614  | 0.000000 |
| 106 | 6 | -3.119460  | -5.868079  | 0.000000 |
| 107 | 6 | 2.458664   | -3.518931  | 0.000000 |
| 108 | 6 | 3.479905   | -4.542155  | 0.000000 |
| 109 | 6 | -3.479905  | -4.542155  | 0.000000 |
| 110 | 6 | -2.458664  | -3.518931  | 0.000000 |
| 111 | 6 | 1.712279   | -7.682853  | 0.000000 |
| 112 | 6 | 3.058802   | -8.110919  | 0.000000 |
| 113 | 6 | 0.719924   | -8.674784  | 0.000000 |
| 114 | 6 | -0.719924  | -8.674784  | 0.000000 |
| 115 | 6 | -1.712279  | -7.682853  | 0.000000 |
| 116 | 6 | 1.123911   | -10.028474 | 0.000000 |
| 117 | 6 | -1.123911  | -10.028474 | 0.000000 |
| 118 | 6 | -3.058802  | -8.110919  | 0.000000 |
| 119 | 6 | 2.466819   | -10.446945 | 0.000000 |
| 120 | 6 | 3.467043   | -9.454911  | 0.000000 |
| 121 | 6 | -3.467043  | -9.454911  | 0.000000 |
| 122 | 6 | -2.466819  | -10.446945 | 0.000000 |
| 123 | 1 | 2.721655   | -11.501070 | 0.000000 |
| 124 | 1 | 4.519038   | -9.716947  | 0.000000 |
| 125 | 1 | -4.519038  | -9.716947  | 0.000000 |
| 126 | 1 | -2.721655  | -11.501070 | 0.000000 |
| 127 | 8 | 0.000000   | -10.877312 | 0.000000 |
| 128 | 8 | 3.936682   | -6.998143  | 0.000000 |
| 129 | 8 | -3.936682  | -6.998143  | 0.000000 |

**Table S6.** The optimized Cartesian coordinates of the complex **6** in the ground singlet state calculated at the B3LYP/6-31G(d) level of theory

| Center Number | Atomic Number | Coordinates (Angstroms) |          |          |
|---------------|---------------|-------------------------|----------|----------|
|               |               | X                       | Y        | Z        |
| 1             | 19            | 0.000000                | 0.000000 | 0.000000 |
| 2             | 6             | -1.713014               | 5.215802 | 2.242701 |
| 3             | 6             | -3.054109               | 4.837694 | 2.245043 |
| 4             | 6             | -3.045090               | 7.034428 | 2.446981 |
| 5             | 6             | -1.703391               | 6.639100 | 2.376006 |
| 6             | 6             | -0.713927               | 7.622172 | 2.462840 |
| 7             | 6             | 0.713927                | 7.622172 | 2.462840 |
| 8             | 6             | 1.105729                | 8.958648 | 2.613016 |

|    |   |            |           |          |
|----|---|------------|-----------|----------|
| 9  | 6 | -1.105729  | 8.958648  | 2.613016 |
| 10 | 6 | 1.703391   | 6.639100  | 2.376006 |
| 11 | 6 | -0.717321  | 4.221231  | 2.144076 |
| 12 | 6 | 0.717321   | 4.221231  | 2.144076 |
| 13 | 6 | 1.713014   | 5.215802  | 2.242701 |
| 14 | 8 | 0.000000   | 9.784762  | 2.700005 |
| 15 | 6 | -1.109077  | 2.892605  | 2.050052 |
| 16 | 6 | 1.109077   | 2.892605  | 2.050052 |
| 17 | 6 | 3.045090   | 7.034428  | 2.446981 |
| 18 | 8 | 3.877536   | 5.931261  | 2.364644 |
| 19 | 6 | -2.448160  | 9.353632  | 2.676880 |
| 20 | 6 | -3.441409  | 8.368615  | 2.591846 |
| 21 | 6 | 3.441409   | 8.368615  | 2.591846 |
| 22 | 6 | 2.448160   | 9.353632  | 2.676880 |
| 23 | 1 | -2.714017  | 10.398109 | 2.796844 |
| 24 | 1 | -4.491276  | 8.634258  | 2.644258 |
| 25 | 1 | 4.491276   | 8.634258  | 2.644258 |
| 26 | 1 | 2.714017   | 10.398109 | 2.796844 |
| 27 | 8 | 0.000000   | 2.061100  | 1.972396 |
| 28 | 6 | -3.488537  | 3.488537  | 2.174825 |
| 29 | 6 | -2.458215  | 2.458215  | 2.070959 |
| 30 | 6 | -4.221231  | -0.717321 | 2.144076 |
| 31 | 6 | -2.892605  | -1.109077 | 2.050052 |
| 32 | 6 | -2.892605  | 1.109077  | 2.050052 |
| 33 | 6 | -4.221231  | 0.717321  | 2.144076 |
| 34 | 6 | -5.215802  | 1.713014  | 2.242701 |
| 35 | 6 | -6.639100  | 1.703391  | 2.376006 |
| 36 | 6 | -7.034428  | 3.045090  | 2.446981 |
| 37 | 6 | -4.837694  | 3.054109  | 2.245043 |
| 38 | 6 | -7.622172  | 0.713927  | 2.462840 |
| 39 | 6 | -5.215802  | -1.713014 | 2.242701 |
| 40 | 6 | -6.639100  | -1.703391 | 2.376006 |
| 41 | 6 | -7.622172  | -0.713927 | 2.462840 |
| 42 | 8 | -5.931261  | 3.877536  | 2.364644 |
| 43 | 8 | -2.061100  | 0.000000  | 1.972396 |
| 44 | 6 | -4.837694  | -3.054109 | 2.245043 |
| 45 | 6 | -7.034428  | -3.045090 | 2.446981 |
| 46 | 6 | -8.958648  | 1.105729  | 2.613016 |
| 47 | 8 | -9.784762  | 0.000000  | 2.700005 |
| 48 | 6 | -8.958648  | -1.105729 | 2.613016 |
| 49 | 6 | -9.353632  | 2.448160  | 2.676880 |
| 50 | 6 | -8.368615  | 3.441409  | 2.591846 |
| 51 | 6 | -9.353632  | -2.448160 | 2.676880 |
| 52 | 6 | -8.368615  | -3.441409 | 2.591846 |
| 53 | 1 | -10.398109 | 2.714017  | 2.796844 |
| 54 | 1 | -8.634258  | 4.491276  | 2.644258 |
| 55 | 1 | -10.398109 | -2.714017 | 2.796844 |
| 56 | 1 | -8.634258  | -4.491276 | 2.644258 |
| 57 | 8 | -5.931261  | -3.877536 | 2.364644 |
| 58 | 6 | 4.221231   | -0.717321 | 2.144076 |
| 59 | 6 | 2.892605   | -1.109077 | 2.050052 |
| 60 | 6 | 2.892605   | 1.109077  | 2.050052 |
| 61 | 6 | 4.221231   | 0.717321  | 2.144076 |
| 62 | 6 | 5.215802   | 1.713014  | 2.242701 |
| 63 | 6 | 6.639100   | 1.703391  | 2.376006 |
| 64 | 6 | 7.034428   | 3.045090  | 2.446981 |
| 65 | 6 | 4.837694   | 3.054109  | 2.245043 |
| 66 | 6 | 7.622172   | 0.713927  | 2.462840 |
| 67 | 6 | 5.215802   | -1.713014 | 2.242701 |
| 68 | 6 | 6.639100   | -1.703391 | 2.376006 |
| 69 | 6 | 7.622172   | -0.713927 | 2.462840 |
| 70 | 8 | 5.931261   | 3.877536  | 2.364644 |
| 71 | 8 | 2.061100   | 0.000000  | 1.972396 |
| 72 | 6 | 4.837694   | -3.054109 | 2.245043 |
| 73 | 6 | 7.034428   | -3.045090 | 2.446981 |
| 74 | 6 | 8.958648   | 1.105729  | 2.613016 |
| 75 | 8 | 9.784762   | 0.000000  | 2.700005 |
| 76 | 6 | 8.958648   | -1.105729 | 2.613016 |
| 77 | 6 | 3.488537   | 3.488537  | 2.174825 |
| 78 | 6 | 2.458215   | 2.458215  | 2.070959 |
| 79 | 6 | 9.353632   | 2.448160  | 2.676880 |
| 80 | 6 | 8.368615   | 3.441409  | 2.591846 |
| 81 | 6 | 9.353632   | -2.448160 | 2.676880 |
| 82 | 6 | 8.368615   | -3.441409 | 2.591846 |
| 83 | 1 | 10.398109  | 2.714017  | 2.796844 |
| 84 | 1 | 8.634258   | 4.491276  | 2.644258 |
| 85 | 1 | 10.398109  | -2.714017 | 2.796844 |
| 86 | 1 | 8.634258   | -4.491276 | 2.644258 |
| 87 | 8 | 5.931261   | -3.877536 | 2.364644 |

|     |   |           |            |           |
|-----|---|-----------|------------|-----------|
| 88  | 6 | 2.458215  | -2.458215  | 2.070959  |
| 89  | 6 | 3.488537  | -3.488537  | 2.174825  |
| 90  | 6 | 1.703391  | -6.639100  | 2.376006  |
| 91  | 6 | 3.045090  | -7.034428  | 2.446981  |
| 92  | 6 | 3.054109  | -4.837694  | 2.245043  |
| 93  | 6 | 1.713014  | -5.215802  | 2.242701  |
| 94  | 6 | 0.717321  | -4.221231  | 2.144076  |
| 95  | 6 | -0.717321 | -4.221231  | 2.144076  |
| 96  | 6 | -1.109077 | -2.892605  | 2.050052  |
| 97  | 6 | 1.109077  | -2.892605  | 2.050052  |
| 98  | 6 | -1.713014 | -5.215802  | 2.242701  |
| 99  | 6 | 0.713927  | -7.622172  | 2.462840  |
| 100 | 6 | -0.713927 | -7.622172  | 2.462840  |
| 101 | 6 | -1.703391 | -6.639100  | 2.376006  |
| 102 | 8 | 0.000000  | -2.061100  | 1.972396  |
| 103 | 8 | 3.877536  | -5.931261  | 2.364644  |
| 104 | 6 | 1.105729  | -8.958648  | 2.613016  |
| 105 | 6 | -1.105729 | -8.958648  | 2.613016  |
| 106 | 6 | -3.054109 | -4.837694  | 2.245043  |
| 107 | 8 | -3.877536 | -5.931261  | 2.364644  |
| 108 | 6 | -3.045090 | -7.034428  | 2.446981  |
| 109 | 6 | -3.488537 | -3.488537  | 2.174825  |
| 110 | 6 | -2.458215 | -2.458215  | 2.070959  |
| 111 | 6 | 2.448160  | -9.353632  | 2.676880  |
| 112 | 6 | 3.441409  | -8.368615  | 2.591846  |
| 113 | 6 | -3.441409 | -8.368615  | 2.591846  |
| 114 | 6 | -2.448160 | -9.353632  | 2.676880  |
| 115 | 1 | 2.714017  | -10.398109 | 2.796844  |
| 116 | 1 | 4.491276  | -8.634258  | 2.644258  |
| 117 | 1 | -4.491276 | -8.634258  | 2.644258  |
| 118 | 1 | -2.714017 | -10.398109 | 2.796844  |
| 119 | 8 | 0.000000  | -9.784762  | 2.700005  |
| 120 | 6 | 3.054109  | 4.837694   | 2.245043  |
| 121 | 8 | -3.877536 | 5.931261   | 2.364644  |
| 122 | 6 | -1.713014 | 5.215802   | -2.242701 |
| 123 | 6 | -3.054109 | 4.837694   | -2.245043 |
| 124 | 6 | -3.045090 | 7.034428   | -2.446981 |
| 125 | 6 | -1.703391 | 6.639100   | -2.376006 |
| 126 | 6 | -0.713927 | 7.622172   | -2.462840 |
| 127 | 6 | 0.713927  | 7.622172   | -2.462840 |
| 128 | 6 | 1.105729  | 8.958648   | -2.613016 |
| 129 | 6 | -1.105729 | 8.958648   | -2.613016 |
| 130 | 6 | 1.703391  | 6.639100   | -2.376006 |
| 131 | 6 | -0.717321 | 4.221231   | -2.144076 |
| 132 | 6 | 0.717321  | 4.221231   | -2.144076 |
| 133 | 6 | 1.713014  | 5.215802   | -2.242701 |
| 134 | 8 | 0.000000  | 9.784762   | -2.700005 |
| 135 | 6 | -1.109077 | 2.892605   | -2.050052 |
| 136 | 6 | 1.109077  | 2.892605   | -2.050052 |
| 137 | 6 | 3.045090  | 7.034428   | -2.446981 |
| 138 | 8 | 3.877536  | 5.931261   | -2.364644 |
| 139 | 6 | -2.448160 | 9.353632   | -2.676880 |
| 140 | 6 | -3.441409 | 8.368615   | -2.591846 |
| 141 | 6 | 3.441409  | 8.368615   | -2.591846 |
| 142 | 6 | 2.448160  | 9.353632   | -2.676880 |
| 143 | 1 | -2.714017 | 10.398109  | -2.796844 |
| 144 | 1 | -4.491276 | 8.634258   | -2.644258 |
| 145 | 1 | 4.491276  | 8.634258   | -2.644258 |
| 146 | 1 | 2.714017  | 10.398109  | -2.796844 |
| 147 | 8 | 0.000000  | 2.061100   | -1.972396 |
| 148 | 6 | -3.488537 | 3.488537   | -2.174825 |
| 149 | 6 | -2.458215 | 2.458215   | -2.070959 |
| 150 | 6 | -4.221231 | -0.717321  | -2.144076 |
| 151 | 6 | -2.892605 | -1.109077  | -2.050052 |
| 152 | 6 | -2.892605 | 1.109077   | -2.050052 |
| 153 | 6 | -4.221231 | 0.717321   | -2.144076 |
| 154 | 6 | -5.215802 | 1.713014   | -2.242701 |
| 155 | 6 | -6.639100 | 1.703391   | -2.376006 |
| 156 | 6 | -7.034428 | 3.045090   | -2.446981 |
| 157 | 6 | -4.837694 | 3.054109   | -2.245043 |
| 158 | 6 | -7.622172 | 0.713927   | -2.462840 |
| 159 | 6 | -5.215802 | -1.713014  | -2.242701 |
| 160 | 6 | -6.639100 | -1.703391  | -2.376006 |
| 161 | 6 | -7.622172 | -0.713927  | -2.462840 |
| 162 | 8 | -5.931261 | 3.877536   | -2.364644 |
| 163 | 8 | -2.061100 | 0.000000   | -1.972396 |
| 164 | 6 | -4.837694 | -3.054109  | -2.245043 |
| 165 | 6 | -7.034428 | -3.045090  | -2.446981 |
| 166 | 6 | -8.958648 | 1.105729   | -2.613016 |

|     |   |            |            |           |
|-----|---|------------|------------|-----------|
| 167 | 8 | -9.784762  | 0.000000   | -2.700005 |
| 168 | 6 | -8.958648  | -1.105729  | -2.613016 |
| 169 | 6 | -9.353632  | 2.448160   | -2.676880 |
| 170 | 6 | -8.368615  | 3.441409   | -2.591846 |
| 171 | 6 | -9.353632  | -2.448160  | -2.676880 |
| 172 | 6 | -8.368615  | -3.441409  | -2.591846 |
| 173 | 1 | -10.398109 | 2.714017   | -2.796844 |
| 174 | 1 | -8.634258  | 4.491276   | -2.644258 |
| 175 | 1 | -10.398109 | -2.714017  | -2.796844 |
| 176 | 1 | -8.634258  | -4.491276  | -2.644258 |
| 177 | 8 | -5.931261  | -3.877536  | -2.364644 |
| 178 | 6 | 4.221231   | -0.717321  | -2.144076 |
| 179 | 6 | 2.892605   | -1.109077  | -2.050052 |
| 180 | 6 | 2.892605   | 1.109077   | -2.050052 |
| 181 | 6 | 4.221231   | 0.717321   | -2.144076 |
| 182 | 6 | 5.215802   | 1.713014   | -2.242701 |
| 183 | 6 | 6.639100   | 1.703391   | -2.376006 |
| 184 | 6 | 7.034428   | 3.045090   | -2.446981 |
| 185 | 6 | 4.837694   | 3.054109   | -2.245043 |
| 186 | 6 | 7.622172   | 0.713927   | -2.462840 |
| 187 | 6 | 5.215802   | -1.713014  | -2.242701 |
| 188 | 6 | 6.639100   | -1.703391  | -2.376006 |
| 189 | 6 | 7.622172   | -0.713927  | -2.462840 |
| 190 | 8 | 5.931261   | 3.877536   | -2.364644 |
| 191 | 8 | 2.061100   | 0.000000   | -1.972396 |
| 192 | 6 | 4.837694   | -3.054109  | -2.245043 |
| 193 | 6 | 7.034428   | -3.045090  | -2.446981 |
| 194 | 6 | 8.958648   | 1.105729   | -2.613016 |
| 195 | 8 | 9.784762   | 0.000000   | -2.700005 |
| 196 | 6 | 8.958648   | -1.105729  | -2.613016 |
| 197 | 6 | 3.488537   | 3.488537   | -2.174825 |
| 198 | 6 | 2.458215   | 2.458215   | -2.070959 |
| 199 | 6 | 9.353632   | 2.448160   | -2.676880 |
| 200 | 6 | 8.368615   | 3.441409   | -2.591846 |
| 201 | 6 | 9.353632   | -2.448160  | -2.676880 |
| 202 | 6 | 8.368615   | -3.441409  | -2.591846 |
| 203 | 1 | 10.398109  | 2.714017   | -2.796844 |
| 204 | 1 | 8.634258   | 4.491276   | -2.644258 |
| 205 | 1 | 10.398109  | -2.714017  | -2.796844 |
| 206 | 1 | 8.634258   | -4.491276  | -2.644258 |
| 207 | 8 | 5.931261   | -3.877536  | -2.364644 |
| 208 | 6 | 2.458215   | -2.458215  | -2.070959 |
| 209 | 6 | 3.488537   | -3.488537  | -2.174825 |
| 210 | 6 | 1.703391   | -6.639100  | -2.376006 |
| 211 | 6 | 3.045090   | -7.034428  | -2.446981 |
| 212 | 6 | 3.054109   | -4.837694  | -2.245043 |
| 213 | 6 | 1.713014   | -5.215802  | -2.242701 |
| 214 | 6 | 0.717321   | -4.221231  | -2.144076 |
| 215 | 6 | -0.717321  | -4.221231  | -2.144076 |
| 216 | 6 | -1.109077  | -2.892605  | -2.050052 |
| 217 | 6 | 1.109077   | -2.892605  | -2.050052 |
| 218 | 6 | -1.713014  | -5.215802  | -2.242701 |
| 219 | 6 | 0.713927   | -7.622172  | -2.462840 |
| 220 | 6 | -0.713927  | -7.622172  | -2.462840 |
| 221 | 6 | -1.703391  | -6.639100  | -2.376006 |
| 222 | 8 | 0.000000   | -2.061100  | -1.972396 |
| 223 | 8 | 3.877536   | -5.931261  | -2.364644 |
| 224 | 6 | 1.105729   | -8.958648  | -2.613016 |
| 225 | 6 | -1.105729  | -8.958648  | -2.613016 |
| 226 | 6 | -3.054109  | -4.837694  | -2.245043 |
| 227 | 8 | -3.877536  | -5.931261  | -2.364644 |
| 228 | 6 | -3.045090  | -7.034428  | -2.446981 |
| 229 | 6 | -3.488537  | -3.488537  | -2.174825 |
| 230 | 6 | -2.458215  | -2.458215  | -2.070959 |
| 231 | 6 | 2.448160   | -9.353632  | -2.676880 |
| 232 | 6 | 3.441409   | -8.368615  | -2.591846 |
| 233 | 6 | -3.441409  | -8.368615  | -2.591846 |
| 234 | 6 | -2.448160  | -9.353632  | -2.676880 |
| 235 | 1 | 2.714017   | -10.398109 | -2.796844 |
| 236 | 1 | 4.491276   | -8.634258  | -2.644258 |
| 237 | 1 | -4.491276  | -8.634258  | -2.644258 |
| 238 | 1 | -2.714017  | -10.398109 | -2.796844 |
| 239 | 8 | 0.000000   | -9.784762  | -2.700005 |
| 240 | 6 | 3.054109   | 4.837694   | -2.245043 |
| 241 | 8 | -3.877536  | 5.931261   | -2.364644 |

**Table S7.** The optimized Cartesian coordinates of the complex **7** in the ground singlet state calculated at the B3LYP/6–31G(d) level of theory

| Center<br>Number | Atomic<br>Number | Coordinates (Angstroms) |           |          |
|------------------|------------------|-------------------------|-----------|----------|
|                  |                  | X                       | Y         | Z        |
| 1                | 20               | 0.000000                | 0.000000  | 0.000000 |
| 2                | 6                | -1.709360               | 5.210025  | 2.065277 |
| 3                | 6                | -3.051517               | 4.832652  | 2.072651 |
| 4                | 6                | -3.040732               | 7.021939  | 2.325166 |
| 5                | 6                | -1.700203               | 6.628821  | 2.236061 |
| 6                | 6                | -0.713013               | 7.611794  | 2.339403 |
| 7                | 6                | 0.713013                | 7.611794  | 2.339403 |
| 8                | 6                | 1.105086                | 8.944407  | 2.518809 |
| 9                | 6                | -1.105086               | 8.944407  | 2.518809 |
| 10               | 6                | 1.700203                | 6.628821  | 2.236061 |
| 11               | 6                | -0.718123               | 4.215779  | 1.916556 |
| 12               | 6                | 0.718123                | 4.215779  | 1.916556 |
| 13               | 6                | 1.709360                | 5.210025  | 2.065277 |
| 14               | 8                | 0.000000                | 9.767016  | 2.620392 |
| 15               | 6                | -1.117911               | 2.898197  | 1.766891 |
| 16               | 6                | 1.117911                | 2.898197  | 1.766891 |
| 17               | 6                | 3.040732                | 7.021939  | 2.325166 |
| 18               | 8                | 3.872599                | 5.918474  | 2.224916 |
| 19               | 6                | -2.448315               | 9.336473  | 2.597147 |
| 20               | 6                | -3.439945               | 8.352012  | 2.499622 |
| 21               | 6                | 3.439945                | 8.352012  | 2.499622 |
| 22               | 6                | 2.448315                | 9.336473  | 2.597147 |
| 23               | 1                | -2.715785               | 10.377404 | 2.741469 |
| 24               | 1                | -4.489870               | 8.613412  | 2.567045 |
| 25               | 1                | 4.489870                | 8.613412  | 2.567045 |
| 26               | 1                | 2.715785                | 10.377404 | 2.741469 |
| 27               | 8                | 0.000000                | 2.056156  | 1.626898 |
| 28               | 6                | -3.487846               | 3.487846  | 1.974188 |
| 29               | 6                | -2.461108               | 2.461108  | 1.807448 |
| 30               | 6                | -4.215779               | -0.718123 | 1.916556 |
| 31               | 6                | -2.898197               | -1.117911 | 1.766891 |
| 32               | 6                | -2.898197               | 1.117911  | 1.766891 |
| 33               | 6                | -4.215779               | 0.718123  | 1.916556 |
| 34               | 6                | -5.210025               | 1.709360  | 2.065277 |
| 35               | 6                | -6.628821               | 1.700203  | 2.236061 |
| 36               | 6                | -7.021939               | 3.040732  | 2.325166 |
| 37               | 6                | -4.832652               | 3.051517  | 2.072651 |
| 38               | 6                | -7.611794               | 0.713013  | 2.339403 |
| 39               | 6                | -5.210025               | -1.709360 | 2.065277 |
| 40               | 6                | -6.628821               | -1.700203 | 2.236061 |
| 41               | 6                | -7.611794               | -0.713013 | 2.339403 |
| 42               | 8                | -5.918474               | 3.872599  | 2.224916 |
| 43               | 8                | -2.056156               | 0.000000  | 1.626898 |
| 44               | 6                | -4.832652               | -3.051517 | 2.072651 |
| 45               | 6                | -7.021939               | -3.040732 | 2.325166 |
| 46               | 6                | -8.944407               | 1.105086  | 2.518809 |
| 47               | 8                | -9.767016               | 0.000000  | 2.620392 |
| 48               | 6                | -8.944407               | -1.105086 | 2.518809 |
| 49               | 6                | -9.336473               | 2.448315  | 2.597147 |
| 50               | 6                | -8.352012               | 3.439945  | 2.499622 |
| 51               | 6                | -9.336473               | -2.448315 | 2.597147 |
| 52               | 6                | -8.352012               | -3.439945 | 2.499622 |
| 53               | 1                | -10.377404              | 2.715785  | 2.741469 |
| 54               | 1                | -8.613412               | 4.489870  | 2.567045 |
| 55               | 1                | -10.377404              | -2.715785 | 2.741469 |
| 56               | 1                | -8.613412               | -4.489870 | 2.567045 |
| 57               | 8                | -5.918474               | -3.872599 | 2.224916 |
| 58               | 6                | 4.215779                | -0.718123 | 1.916556 |
| 59               | 6                | 2.898197                | -1.117911 | 1.766891 |
| 60               | 6                | 2.898197                | 1.117911  | 1.766891 |
| 61               | 6                | 4.215779                | 0.718123  | 1.916556 |
| 62               | 6                | 5.210025                | 1.709360  | 2.065277 |
| 63               | 6                | 6.628821                | 1.700203  | 2.236061 |
| 64               | 6                | 7.021939                | 3.040732  | 2.325166 |
| 65               | 6                | 4.832652                | 3.051517  | 2.072651 |
| 66               | 6                | 7.611794                | 0.713013  | 2.339403 |
| 67               | 6                | 5.210025                | -1.709360 | 2.065277 |
| 68               | 6                | 6.628821                | -1.700203 | 2.236061 |
| 69               | 6                | 7.611794                | -0.713013 | 2.339403 |
| 70               | 8                | 5.918474                | 3.872599  | 2.224916 |

|     |   |           |            |           |
|-----|---|-----------|------------|-----------|
| 71  | 8 | 2.056156  | 0.000000   | 1.626898  |
| 72  | 6 | 4.832652  | -3.051517  | 2.072651  |
| 73  | 6 | 7.021939  | -3.040732  | 2.325166  |
| 74  | 6 | 8.944407  | 1.105086   | 2.518809  |
| 75  | 8 | 9.767016  | 0.000000   | 2.620392  |
| 76  | 6 | 8.944407  | -1.105086  | 2.518809  |
| 77  | 6 | 3.487846  | 3.487846   | 1.974188  |
| 78  | 6 | 2.461108  | 2.461108   | 1.807448  |
| 79  | 6 | 9.336473  | 2.448315   | 2.597147  |
| 80  | 6 | 8.352012  | 3.439945   | 2.499622  |
| 81  | 6 | 9.336473  | -2.448315  | 2.597147  |
| 82  | 6 | 8.352012  | -3.439945  | 2.499622  |
| 83  | 1 | 10.377404 | 2.715785   | 2.741469  |
| 84  | 1 | 8.613412  | 4.489870   | 2.567045  |
| 85  | 1 | 10.377404 | -2.715785  | 2.741469  |
| 86  | 1 | 8.613412  | -4.489870  | 2.567045  |
| 87  | 8 | 5.918474  | -3.872599  | 2.224916  |
| 88  | 6 | 2.461108  | -2.461108  | 1.807448  |
| 89  | 6 | 3.487846  | -3.487846  | 1.974188  |
| 90  | 6 | 1.700203  | -6.628821  | 2.236061  |
| 91  | 6 | 3.040732  | -7.021939  | 2.325166  |
| 92  | 6 | 3.051517  | -4.832652  | 2.072651  |
| 93  | 6 | 1.709360  | -5.210025  | 2.065277  |
| 94  | 6 | 0.718123  | -4.215779  | 1.916556  |
| 95  | 6 | -0.718123 | -4.215779  | 1.916556  |
| 96  | 6 | -1.117911 | -2.898197  | 1.766891  |
| 97  | 6 | 1.117911  | -2.898197  | 1.766891  |
| 98  | 6 | -1.709360 | -5.210025  | 2.065277  |
| 99  | 6 | 0.713013  | -7.611794  | 2.339403  |
| 100 | 6 | -0.713013 | -7.611794  | 2.339403  |
| 101 | 6 | -1.700203 | -6.628821  | 2.236061  |
| 102 | 8 | 0.000000  | -2.056156  | 1.626898  |
| 103 | 8 | 3.872599  | -5.918474  | 2.224916  |
| 104 | 6 | 1.105086  | -8.944407  | 2.518809  |
| 105 | 6 | -1.105086 | -8.944407  | 2.518809  |
| 106 | 6 | -3.051517 | -4.832652  | 2.072651  |
| 107 | 8 | -3.872599 | -5.918474  | 2.224916  |
| 108 | 6 | -3.040732 | -7.021939  | 2.325166  |
| 109 | 6 | -3.487846 | -3.487846  | 1.974188  |
| 110 | 6 | -2.461108 | -2.461108  | 1.807448  |
| 111 | 6 | 2.448315  | -9.336473  | 2.597147  |
| 112 | 6 | 3.439945  | -8.352012  | 2.499622  |
| 113 | 6 | -3.439945 | -8.352012  | 2.499622  |
| 114 | 6 | -2.448315 | -9.336473  | 2.597147  |
| 115 | 1 | 2.715785  | -10.377404 | 2.741469  |
| 116 | 1 | 4.489870  | -8.613412  | 2.567045  |
| 117 | 1 | -4.489870 | -8.613412  | 2.567045  |
| 118 | 1 | -2.715785 | -10.377404 | 2.741469  |
| 119 | 8 | 0.000000  | -9.767016  | 2.620392  |
| 120 | 6 | 3.051517  | 4.832652   | 2.072651  |
| 121 | 8 | -3.872599 | 5.918474   | 2.224916  |
| 122 | 6 | -1.709360 | 5.210025   | -2.065277 |
| 123 | 6 | -3.051517 | 4.832652   | -2.072651 |
| 124 | 6 | -3.040732 | 7.021939   | -2.325166 |
| 125 | 6 | -1.700203 | 6.628821   | -2.236061 |
| 126 | 6 | -0.713013 | 7.611794   | -2.339403 |
| 127 | 6 | 0.713013  | 7.611794   | -2.339403 |
| 128 | 6 | 1.105086  | 8.944407   | -2.518809 |
| 129 | 6 | -1.105086 | 8.944407   | -2.518809 |
| 130 | 6 | 1.700203  | 6.628821   | -2.236061 |
| 131 | 6 | -0.718123 | 4.215779   | -1.916556 |
| 132 | 6 | 0.718123  | 4.215779   | -1.916556 |
| 133 | 6 | 1.709360  | 5.210025   | -2.065277 |
| 134 | 8 | 0.000000  | 9.767016   | -2.620392 |
| 135 | 6 | -1.117911 | 2.898197   | -1.766891 |
| 136 | 6 | 1.117911  | 2.898197   | -1.766891 |
| 137 | 6 | 3.040732  | 7.021939   | -2.325166 |
| 138 | 8 | 3.872599  | 5.918474   | -2.224916 |
| 139 | 6 | -2.448315 | 9.336473   | -2.597147 |
| 140 | 6 | -3.439945 | 8.352012   | -2.499622 |
| 141 | 6 | 3.439945  | 8.352012   | -2.499622 |
| 142 | 6 | 2.448315  | 9.336473   | -2.597147 |
| 143 | 1 | -2.715785 | 10.377404  | -2.741469 |
| 144 | 1 | -4.489870 | 8.613412   | -2.567045 |
| 145 | 1 | 4.489870  | 8.613412   | -2.567045 |
| 146 | 1 | 2.715785  | 10.377404  | -2.741469 |
| 147 | 8 | 0.000000  | 2.056156   | -1.626898 |
| 148 | 6 | -3.487846 | 3.487846   | -1.974188 |
| 149 | 6 | -2.461108 | 2.461108   | -1.807448 |



|     |   |            |           |           |
|-----|---|------------|-----------|-----------|
| 150 | 6 | -4.215779  | -0.718123 | -1.916556 |
| 151 | 6 | -2.898197  | -1.117911 | -1.766891 |
| 152 | 6 | -2.898197  | 1.117911  | -1.766891 |
| 153 | 6 | -4.215779  | 0.718123  | -1.916556 |
| 154 | 6 | -5.210025  | 1.709360  | -2.065277 |
| 155 | 6 | -6.628821  | 1.700203  | -2.236061 |
| 156 | 6 | -7.021939  | 3.040732  | -2.325166 |
| 157 | 6 | -4.832652  | 3.051517  | -2.072651 |
| 158 | 6 | -7.611794  | 0.713013  | -2.339403 |
| 159 | 6 | -5.210025  | -1.709360 | -2.065277 |
| 160 | 6 | -6.628821  | -1.700203 | -2.236061 |
| 161 | 6 | -7.611794  | -0.713013 | -2.339403 |
| 162 | 8 | -5.918474  | 3.872599  | -2.224916 |
| 163 | 8 | -2.056156  | 0.000000  | -1.626898 |
| 164 | 6 | -4.832652  | -3.051517 | -2.072651 |
| 165 | 6 | -7.021939  | -3.040732 | -2.325166 |
| 166 | 6 | -8.944407  | 1.105086  | -2.518809 |
| 167 | 8 | -9.767016  | 0.000000  | -2.620392 |
| 168 | 6 | -8.944407  | -1.105086 | -2.518809 |
| 169 | 6 | -9.336473  | 2.448315  | -2.597147 |
| 170 | 6 | -8.352012  | 3.439945  | -2.499622 |
| 171 | 6 | -9.336473  | -2.448315 | -2.597147 |
| 172 | 6 | -8.352012  | -3.439945 | -2.499622 |
| 173 | 1 | -10.377404 | 2.715785  | -2.741469 |
| 174 | 1 | -8.613412  | 4.489870  | -2.567045 |
| 175 | 1 | -10.377404 | -2.715785 | -2.741469 |
| 176 | 1 | -8.613412  | -4.489870 | -2.567045 |
| 177 | 8 | -5.918474  | -3.872599 | -2.224916 |
| 178 | 6 | 4.215779   | -0.718123 | -1.916556 |
| 179 | 6 | 2.898197   | -1.117911 | -1.766891 |
| 180 | 6 | 2.898197   | 1.117911  | -1.766891 |
| 181 | 6 | 4.215779   | 0.718123  | -1.916556 |
| 182 | 6 | 5.210025   | 1.709360  | -2.065277 |
| 183 | 6 | 6.628821   | 1.700203  | -2.236061 |
| 184 | 6 | 7.021939   | 3.040732  | -2.325166 |
| 185 | 6 | 4.832652   | 3.051517  | -2.072651 |
| 186 | 6 | 7.611794   | 0.713013  | -2.339403 |
| 187 | 6 | 5.210025   | -1.709360 | -2.065277 |
| 188 | 6 | 6.628821   | -1.700203 | -2.236061 |
| 189 | 6 | 7.611794   | -0.713013 | -2.339403 |
| 190 | 8 | 5.918474   | 3.872599  | -2.224916 |
| 191 | 8 | 2.056156   | 0.000000  | -1.626898 |
| 192 | 6 | 4.832652   | -3.051517 | -2.072651 |
| 193 | 6 | 7.021939   | -3.040732 | -2.325166 |
| 194 | 6 | 8.944407   | 1.105086  | -2.518809 |
| 195 | 8 | 9.767016   | 0.000000  | -2.620392 |
| 196 | 6 | 8.944407   | -1.105086 | -2.518809 |
| 197 | 6 | 3.487846   | 3.487846  | -1.974188 |
| 198 | 6 | 2.461108   | 2.461108  | -1.807448 |
| 199 | 6 | 9.336473   | 2.448315  | -2.597147 |
| 200 | 6 | 8.352012   | 3.439945  | -2.499622 |
| 201 | 6 | 9.336473   | -2.448315 | -2.597147 |
| 202 | 6 | 8.352012   | -3.439945 | -2.499622 |
| 203 | 1 | 10.377404  | 2.715785  | -2.741469 |
| 204 | 1 | 8.613412   | 4.489870  | -2.567045 |
| 205 | 1 | 10.377404  | -2.715785 | -2.741469 |
| 206 | 1 | 8.613412   | -4.489870 | -2.567045 |
| 207 | 8 | 5.918474   | -3.872599 | -2.224916 |
| 208 | 6 | 2.461108   | -2.461108 | -1.807448 |
| 209 | 6 | 3.487846   | -3.487846 | -1.974188 |
| 210 | 6 | 1.700203   | -6.628821 | -2.236061 |
| 211 | 6 | 3.040732   | -7.021939 | -2.325166 |
| 212 | 6 | 3.051517   | -4.832652 | -2.072651 |
| 213 | 6 | 1.709360   | -5.210025 | -2.065277 |
| 214 | 6 | 0.718123   | -4.215779 | -1.916556 |
| 215 | 6 | -0.718123  | -4.215779 | -1.916556 |
| 216 | 6 | -1.117911  | -2.898197 | -1.766891 |
| 217 | 6 | 1.117911   | -2.898197 | -1.766891 |
| 218 | 6 | -1.709360  | -5.210025 | -2.065277 |
| 219 | 6 | 0.713013   | -7.611794 | -2.339403 |
| 220 | 6 | -0.713013  | -7.611794 | -2.339403 |
| 221 | 6 | -1.700203  | -6.628821 | -2.236061 |
| 222 | 8 | 0.000000   | -2.056156 | -1.626898 |
| 223 | 8 | 3.872599   | -5.918474 | -2.224916 |
| 224 | 6 | 1.105086   | -8.944407 | -2.518809 |
| 225 | 6 | -1.105086  | -8.944407 | -2.518809 |
| 226 | 6 | -3.051517  | -4.832652 | -2.072651 |
| 227 | 8 | -3.872599  | -5.918474 | -2.224916 |
| 228 | 6 | -3.040732  | -7.021939 | -2.325166 |

|     |   |           |            |           |
|-----|---|-----------|------------|-----------|
| 229 | 6 | -3.487846 | -3.487846  | -1.974188 |
| 230 | 6 | -2.461108 | -2.461108  | -1.807448 |
| 231 | 6 | 2.448315  | -9.336473  | -2.597147 |
| 232 | 6 | 3.439945  | -8.352012  | -2.499622 |
| 233 | 6 | -3.439945 | -8.352012  | -2.499622 |
| 234 | 6 | -2.448315 | -9.336473  | -2.597147 |
| 235 | 1 | 2.715785  | -10.377404 | -2.741469 |
| 236 | 1 | 4.489870  | -8.613412  | -2.567045 |
| 237 | 1 | -4.489870 | -8.613412  | -2.567045 |
| 238 | 1 | -2.715785 | -10.377404 | -2.741469 |
| 239 | 8 | 0.000000  | -9.767016  | -2.620392 |
| 240 | 6 | 3.051517  | 4.832652   | -2.072651 |
| 241 | 8 | -3.872599 | 5.918474   | -2.224916 |

---
